# Supplementary material
Source: publisher site journal article supplement (https://www.dovepress.com/get_supplementary_file.php?f=369084.docx)
Supplement: Supplementary file 1 [file get_supplementary_file.php]

**Supplementary Table 1** **Questionnaire responses related to factors influencing job motivation of female pharmacists**

| **Factors** | **Number of responses** |
| --- | --- |
| ***Work-place characteristics:***  Work location (city, district)  Job description and policies clarity  Availability of transportation  Availability of resources  Grievance redressal mechanism  Opportunity to travel and work internationally  Opportunity for continuous training  Recognition, appreciation and rewarding  Job accessibility  Job security  Working schedule (hrs./days)  Availability of medical insurance  No evening or night work  Induction training program  Intellectual work  Pension  Financial incentives and bonus  Education opportunities for children  Pay for performance  Maternity leave provisions | 194  191  159  182  128  146  193  206  202  150  166  184  113  186  170  128  196  139  177  140 |
| **Percentage** | **27.77%** |
| ***Working conditions:***  Physical working conditions  Way discipline is imposed  Stable job  Career advancement and promotion opportunities  Opportunity to do the job without threat  Opportunity to do the job without fear  Contact with people locally and internationally  Prestigious jobs  Opportunity to do the job without compulsion  Independence/flexibility in the job  Job opportunity  Transparency in recruitment/selection  Early exposure through family, friends or relatives  No interaction with patients  Work life balance and compatibility with the family life and time | 160  163  163  197  182  159  210  159  172  199  206  173  110  121  165 |
| **Percentage** | **21.05%** |
| ***Personal characteristics:***  Believing in my role in victory and defeat  Respect for myself  Pride in organization  Intellectual curiosity  Fit with my personal characteristics (skills, competencies and abilities)  Vocational interests  The desire for gainful employment | 199  206  181  186  205  165  206 |
| **Percentage** | **11.17%** |
| ***Individual priorities:***  Opportunity to learn new skills  Housing  Interest in pharmaceutical business  The desire to give back to my career  Enhance your social status  Enhance my social status and for social recognition  Better salary  Opportunity to test my own ideas in work  Ability to generate income and to secure my future financially | 217  166  184  178  206  191  186  192  192 |
| **Percentage** | **14.19%** |
| ***Internal psychological states:***  Encouragement for well accomplished job  Wish to add something to my career  The sense of personal satisfaction and enjoyment  Personal interest  Personal fulfilment  Self-validation  Fulfilling a sense of achievement  Professional autonomy and independence  Intellectual satisfaction  The tendency toward optimism about myself  Enjoying interacting with others  The desire to be a role model for other woman in the career  Influenced by peers  Influenced by parents, siblings, family members  Influenced by university faculty  Fulfil my lifelong ambition  Accidental career choice  Was the only available choice | 197  205  197  187  198  201  207  202  199  202  208  192  133  116  91  174  111  95 |
| **Percentage** | **25.82%** |
